1 **Cognate T and B cell interaction and association of Follicular helper T cells with B cell**  
2 **responses in *Vibrio cholerae* O1 infected Bangladeshi adults**

3  
4 Rasheduzzaman Rashu<sup>1\*</sup>, Taufiqur Rahman Bhuiyan<sup>1\*</sup>, Mohammad Rubel Hoq<sup>1</sup>, Lazina  
5 Hossain<sup>1</sup>, Anik Paul<sup>1</sup>, Ashraful Islam Khan<sup>1</sup>, Fahima Chowdhury<sup>1</sup>, Jason B Harris<sup>2,3</sup>, Edward T  
6 Ryan<sup>2,4,5</sup>, Stephen B Calderwood<sup>2,4,6</sup>, Ana A Weil<sup>2</sup>, Firdausi Qadri<sup>1#</sup>

7  
8 <sup>1</sup>Infectious Diseases Division, International Centre for Diarrhoeal Disease Research, Bangladesh  
9 (icddr,b), Dhaka, Bangladesh

10 <sup>2</sup>Division of Infectious Diseases, Massachusetts General Hospital, Boston, Massachusetts, USA

11 <sup>3</sup>Department of Pediatrics, Harvard Medical School, Boston, Massachusetts, USA

12 <sup>4</sup>Department of Medicine, Harvard Medical School, Boston, Massachusetts, USA

13 <sup>5</sup>Department of Immunology and Infectious Diseases, Harvard T.H. Chan School of Public  
14 Health, Boston, Massachusetts, USA

15 <sup>6</sup>Department of Microbiology and Immunobiology, Harvard Medical School, Boston,  
16 Massachusetts, USA

17

18 **Running title:** Follicular Helper T cells in Cholera

19

20 **Key Words:** Follicular helper T cells, Cholera, CXCR5, CD40L, B cells

21

22 \* Co-first author; # Corresponding author

23 Corresponding author:

24 Senior Director, Infectious Diseases Division

25 Head, Mucosal Immunology and Vaccinology Laboratory

26 icddr,b, Mohakhali, Dhaka-1212, Bangladesh

27 Tel:880-2-9827001-10, Ext-2431

28 Email: [fqadri@icddr.org](mailto:fqadri@icddr.org)

29 **ABSTRACT**

30 *Vibrio cholerae* O1 can cause life threatening diarrheal disease if left untreated. A long lasting  
31 immune response, producing 3-5 years of protection from subsequent, symptomatic disease  
32 following natural infection, is mediated by B cell mediated humoral immunity. T cells can play  
33 critical roles in inducing such immunity. However, the mechanism of T cell dependent B cell  
34 maturation and whether a key sub-population of T cells are involved is not well established in  
35 cholera. We hypothesized that a specific population of T cells, follicular helper T (Tfh) cells, are  
36 involved in B cell maturation following cholera; we used flow cytometry, culture and  
37 colorimetric assays to address this question. We found that *V. cholerae* infection induces  
38 significant increase in circulating Tfh cells expressing B cell maturation associated protein  
39 CD40L early in disease. The increased Tfh cells expressing CD40L recognize cholera toxin most  
40 prominently, with lessened responses to two antigens tested, *V. cholerae* membrane preparation  
41 (MP) and *Vibrio cholerae* cytolysin (VCC). We further showed that early induction of Tfh cells  
42 and CD40L was associated with later memory B cell responses to same antigens. Lastly, we  
43 demonstrated *in vitro* that Tfh cells isolated after cholera can stimulate class switching of co-  
44 cultured, isolated B cells from patients with cholera, leading to production of the more durable  
45 IgG antibody isotype. These studies were conducted on circulating Tfh cells; future studies will  
46 be directed at examining role of Tfh cells during cholera directly in the gut mucosa of biopsied  
47 samples, at the single cell level if feasible.

## 48 INTRODUCTION

49 Cholera is a life threatening diarrheal disease. It is estimated that 3-5 million cases and  
50 100,000 deaths occur globally every year (1). *Vibrio cholerae* O1, the causative agent of cholera,  
51 produces cholera toxin (CT), *Vibrio cholerae* cytolysin (VCC), a variety of membrane-associated  
52 proteins and the toxin-coregulated pilus A (TcpA), all involved in immunogenicity and  
53 pathogenicity (2, 3). CT, which is a T cell dependent protein antigen, induces salt and water loss  
54 in the intestine, the major cause of dehydration and death (4). Natural infection induces long-  
55 lasting CT-specific IgG producing memory B cells (4). Such T cell dependent protein antigens  
56 can induce anamnestic memory B cell responses on re-exposure, while T cell independent  
57 antigens like lipopolysaccharide (LPS) and the O-specific polysaccharide it contains fail to  
58 produce such durable responses after *V. cholerae* infection (4). In addition to memory B cells  
59 that develop to cholera protein antigens after infection, memory helper T cell responses to  
60 protein antigens also develop after cholera by day 7, prior to initiation of memory B cell  
61 responses to the same antigens; memory helper T cell responses are not seen to LPS (3, 4).

62

63 Among the various types of T cells, Tfh are a subpopulation of CD4+ T cells that are  
64 found in the secondary lymphoid organs as well as peripheral blood (5), express CXCR5 on their  
65 cell surface and, following stimulation by cognate antigen, migrate into the B cell zones of  
66 lymphoid organs, mediated through CXCR5-CXCL13 crosstalk (6, 7). There, Tfh cells interact  
67 with B cells that present the cognate antigen, with the help of MHCII on their cell surface to be  
68 recognized by the TCR; this recognition is facilitated by the interaction of CD40L on the surface  
69 of the activated Tfh and CD40 on the surface of the antigen-presenting B cell (8). This contact  
70 dependent interaction, plus the secretion of cytokines, including IL-21 and IL-4 by the Tfh cell,

71 helps to trigger the formation of germinal centers. The CD40L-CD40 interaction is essential not  
72 only for formation of the germinal center but also for its maintenance in the secondary lymphoid  
73 organs (9). In addition, this bi-directional interaction of Tfh-germinal center (GC) B cells  
74 facilitates the survival of those specific GC B cells. The Tfh-B cell interaction then further leads  
75 to B cell maturation, including isotype switching and somatic hypermutation by inducing  
76 activation-induced cytidine deaminase in B cells; this leads to either the production of mature  
77 plasma cells secreting high affinity, antigen-specific antibodies or the production of antigen-  
78 specific memory B cells (10, 11). The role of Tfh cells, including expression of co-stimulatory  
79 molecules, has not been studied in cholera patients, and whether this same interaction leads to B  
80 cell activation and maturation in this mucosal infection is not known. We performed the current  
81 study to investigate these potential interactions.

## 82 MATERIALS AND METHODS

83           **Study subjects and overview.** Patients with symptoms of severe dehydration were  
84 admitted to the International Centre for Diarrheal Diseases Research, Bangladesh (icddr,b),  
85 Dhaka hospital. Patients' stool was collected, and *V. cholerae* O1 infection was confirmed by  
86 dark field microscopy and by culture on selective taurocholate-tellurite gelatin agar media  
87 described elsewhere (12). The serogroup and serotype of the infecting *V. cholerae* O1 strains  
88 were determined by agglutination test by anti-O1, anti-Ogawa and anti-Inaba specific  
89 monoclonal antibodies (13, 14). Patients confirmed to have *V. cholerae* O1 infection (n=34) were  
90 enrolled following informed consent, and blood was collected acutely during infection (2<sup>nd</sup> day  
91 of hospitalization), during early convalescence (7<sup>th</sup> day after hospitalization) and late in the  
92 convalescent period (30<sup>th</sup> day after hospitalization). Patients were excluded from this study if co-  
93 infected with other enteric pathogens or parasites. The study was approved by Ethical and  
94 Research Review Committees of the International Centre for Diarrhoeal Disease Research,  
95 Dhaka, Bangladesh (icddr,b) and the Institutional Review Board of Massachusetts General  
96 Hospital.

97  
98           **Separation of peripheral blood mononuclear cells (PBMCs) and detection of CD40L**  
99 **expressing Follicular helper T cells.** Heparinized venous blood was collected in BD vacutainer  
100 tubes and diluted with an equal volume of phosphate buffered saline (PBS, 10 mM, pH ~7.2).  
101 Diluted blood was carefully loaded on Ficoll-Isopaque (Pharmacia, Uppsala, Sweden) without  
102 disturbing the Ficoll layer, and then centrifuged at 700 g for 30 minutes at 20°C. After  
103 centrifugation, PBMCs were collected from the top of the Ficoll layer, washed and counted with  
104 a haemocytometer, and cell viability was assessed using trypan blue dye (15). Separated PBMCs

105 were incubated with anti CD3-PE Texas Red (Invitrogen, CA), anti CD4-Amcyan, anti CXCR5-  
106 Alexa-Fluor-488, and anti CD40L-APC-eFluor700 (BD Bioscience, San Jose, CA)  
107 fluorochrome-tagged antibodies. After 45 min of incubation in the dark at 4°C, extra  
108 fluorochrome was washed out with PBS supplemented with 2% fetal bovine serum (FBS)  
109 (HyClone, Logan, UT), the labeled cells diluted to the desired volume and then cell counts  
110 acquired with a FACS Aria III instrument (BD Bioscience, San Jose, CA) and the FACSDiva  
111 software program. We analyzed the acquired data with FlowJo software (TreeStar, Inc., OR),  
112 separating the lymphocyte population depending on side and forward scattered light.  
113 Lymphocytes were then identified by gating on the CD3-positive population, followed by the  
114 CD4-positive population within the CD3-positive cells. Tfh cells were selected by CXCR5  
115 expression on the cell surface of CD4-positive cells, and the Tfh population was selected using  
116 CD40L expression. The results are expressed as percentages.

117

#### 118 **Antigens used for short-term culture and CD40L expression, memory B cell**

119 **enumeration and depleted Tfh cell and B cell co-culture.** Membrane preparation (MP), *V.*  
120 *cholerae* cytolysin (VCC), and cholera holotoxin containing the G33D variant of the B subunit  
121 (mCT) were used in this study. VCC (a gift from Kalyan K. Banerjee) monomer was produced  
122 from a nonclinical *V. cholerae* O1 strain that is biochemically and immunologically similar to *V.*  
123 *cholerae* O1 (16). MP was prepared from *V. cholerae* O1 El Tor strain N16961 grown in AKI  
124 medium and the most abundant proteins were characterized by mass spectrometry (3, 17). mCT  
125 (a gift from Randall K Holmes) has less binding affinity to eukaryotic cell surface ganglioside  
126 (GM1) due to an aspartic acid substitution by glycine on the B subunit, and is a less toxic variant  
127 of wild type cholera toxin (CT), useful in cell culture conditions (18). VCC was used at a

128 concentration of 2.5ng/ml. MP and G33D mCT were used at a concentration of 10µg/ml. We  
129 also used phytohaemagglutinin (PHA) (Remel, USA) as a positive control at 1µg/ml and media  
130 only as a negative control in cell stimulations in culture. In addition, recombinant cholera toxin B  
131 subunit rCTB (a gift from Ann-Mari Svennerholm) was used for enumeration of antigen-specific  
132 memory B cells in the peripheral blood and in enzyme-linked immunosorbent assay (ELISA).  
133 Staphylococcal Enterotoxin B from *Staphylococcus aureus* (SEB) (Sigma, USA) was used as a  
134 positive control for co-culture of depleted Tfh cells and B cells, as done previously (5, 19).

135

136 **Whole blood stimulation by FASCIA.** We used Flow cytometric Assay of Specific  
137 Cell-mediated Immune responses in the Activated whole blood (FASCIA) to measure cellular  
138 proliferation in response to antigenic stimulation as previously described (3, 20, 21). In brief, we  
139 collected whole blood in a lithium-heparinized vacutainer tube and diluted it to a ratio of 1:8 in  
140 Dulbecco modified Eagle medium (Gibco, NY) supplemented with 1% gentamicin, 1%  
141 mercaptoethanol, and 10% heat-inactivated fetal calf serum. We added 100ul of stimulating  
142 antigen, control antigen, or additional medium to each tube of 400ul of diluted blood in a 5-ml  
143 polystyrene tube. After 6 hours of *in vitro* stimulation in a humidified atmosphere with 5% CO<sub>2</sub>  
144 at 37°C, cells were centrifuged and the supernatant was discarded. Whole blood was stained with  
145 anti-CD3-PE Texas Red (Invitrogen, CA), anti-CD4-Amcyan, anti-CXCR5-AF488, and anti-  
146 CD40L-APC eFluor700, monoclonal antibodies (BD Bioscience, San Jose, CA). Red blood cells  
147 were lysed with ammonium chloride solution containing potassium chloride and EDTA, and the  
148 remaining cells were centrifuged, washed and fixed with BD stabilizing fixative (BD Bioscience,  
149 San Jose, CA). Cell counts were acquired for 4 min by FACS Aria III and FACS Diva software  
150 (BD Bioscience). Acquired cell counts were analyzed, counted by FlowJo (San Jose, CA). The



151 magnitude of stimulation is expressed as the ratio of lymphocyte count expressing a certain  
152 protein on their cell surface with antigenic stimulation to the count without stimulation (21, 22).  
153 The ratio is referred to as a stimulation index (SI). An SI value equal to “1” indicates that  
154 stimulation is equal in samples with or without a *V. cholerae* antigen, and more than “1”  
155 indicates *V. cholerae* antigen-specific stimulation. Lymphocytes were gated and counted  
156 depending on forward and side scattering characteristics. CD3<sup>+</sup> cells were gated from  
157 lymphocytes and CD4<sup>+</sup> cells were gated from CD3<sup>+</sup> cells. Tfh cells were counted from CD4<sup>+</sup>  
158 cells based on surface expression of CXCR5 on cell surface. CD40L expressing cells from the  
159 Tfh cell pool were analyzed.

160

161 **Enzyme-linked immunosorbent spot (ELISPOT) assay to measure memory B cells.**

162 Memory B cells were measured by the ELISPOT assay described previously (23, 24); this assay  
163 is optimized for stimulating differentiation of memory B cells into terminal, spot producing  
164 antibody secreting cells (ASCs). In brief, PBMCs were seeded ( $5 \times 10^5$  cells/well) in cell culture  
165 plates (BD Biosciences, San Jose, CA) with RPMI 1640 (Gibco, Carlsbad, CA) and 10% fetal  
166 bovine serum (FBS) (HyClone, Logan, UT). Cells were stimulated with a cocktail of B cell  
167 mitogens containing 6  $\mu\text{g/ml}$  CpG oligonucleotide (Operon, Huntsville, AL), a 1/100,000  
168 dilution of crude pokeweed mitogen extract, and a 1/10,000 dilution of fixed *Staphylococcus*  
169 *aureus* Cowan (Sigma, St. Louis, MO). Plates were incubated at 37°C in 5% CO<sub>2</sub> for 6 days. The  
170 cells were harvested, washed and was transferred onto nitrocellulose membrane-bottom plates  
171 (MSHAN-4550; Millipore, Bedford, MA) for 5 hours. The plates were coated previously with  
172 GM1 ganglioside (3 nmol/ml) overnight followed by recombinant CTB (2.5  $\mu\text{g/ml}$ ), or with 5  
173  $\mu\text{g/ml}$  affinity-purified goat anti-human immunoglobulin (Jackson Immunology Research, West

174 Grove, PA), or 2.5 µg/ml keyhole limpet hemocyanin as a negative control (Pierce  
175 Biotechnology, Rockford, IL). Each coating was followed by blocking with RPMI 1640  
176 containing 10% FBS. After incubation, cells were washed out and horseradish peroxidase-  
177 conjugated goat anti-human IgA (Southern Biotech, USA) and alkaline phosphatase conjugated  
178 goat anti-human IgG (Southern Biotech, USA) were added. Following an overnight incubation at  
179 4°C, plates were developed with 3-amino-9-ethyl carbazole and 5-bromo-4-chloro-3-indolyl-  
180 phosphate/Nitro blue tetrazolium for developing IgA and IgG spots. The spots were counted and  
181 results were expressed as the percentage of antigen-specific memory B cells out of the total  
182 isotype-specific memory B cells.

183

184 **Co-culture of B cells and T follicular helper cells and ELISA measurement of total**  
185 **IgG production after co-culture.** We largely followed a previously published procedure (5),  
186 with the exception that the co-cultures contained *V. cholerae* antigens for Tfh stimulation, with  
187 SEB as a positive control and media only as a negative control. PBMCs were separated by  
188 Ficoll-isopaque at day 7 after hospitalization and stained with anti-CD3-PE Texas Red, anti-CD4  
189 Amcyan, anti-CD45R0 PE, anti- CXCR5-Alexa Flour 488, and anti-CD19-PerCP-Cy 5.5 and  
190 kept in the dark for 45 min at 4°C. Then, the cells were washed with PBS 2% FBS to remove any  
191 unbound fluorochrome tagged antibody, passed through a 40µm cell strainer (BD) and diluted  
192 with PBS supplemented with 2% FBS to the desired concentration for sorting approximately 10  
193 million cells per milliliter of buffer. CD19+ B cells, CD3+CD4+CD45R0+CXCR5+ memory  
194 Tfh cells (Tfh+) and CD3+CD4+CD45R0+CXCR5- memory cells (Tfh-) were sorted with a  
195 FACS AriaIII sorter and collected in three different 1% BSA pre-coated 5 ml polystyrene tubes  
196 (BD Falcon). After sorting, the separated cells were centrifuged and diluted to the desired

197 volume. Sorted cell types were rerun to check the purity of the sorted cells; the percentage of  
198 purity was more than 98 percent. Sorted B cells (50,000 cells) were co-cultured with Tfh+  
199 (50,000 cells) or Tfh- (50,000 cells) cells with antigenic stimulation for seven days in a  
200 humidified 5% CO<sub>2</sub> incubator at 37°C. After seven days of co-culture, culture supernatants were  
201 collected and stored at -80°C to measure secreted IgG.

202

203 ELISA was used to measure the total secreted IgG from co-cultured supernatants (23). In  
204 brief, a 96-well polystyrene plate (Nunc F) was coated with 5 µg/ml affinity-purified goat anti-  
205 human immunoglobulin (Jackson Immunology Research, West Grove, PA). Culture supernatant  
206 or ChromPure Human IgG molecule (Jackson Immunology Research, West Grove, PA) was  
207 applied and incubated for 90 minutes, followed by the addition of horseradish peroxidase-  
208 conjugated secondary antibodies to human IgG (Jackson Immunoresearch, USA). The plate was  
209 developed with ortho-phenylene diamine (Sigma, St. Louis, MO) in 0.1 M sodium citrate buffer  
210 (pH 4.5) and 0.1% hydrogen peroxide. The developed color was read using a microplate reader  
211 (Eon). Sample concentrations were determined by comparing to the known concentrations of  
212 pure IgG.

213

214 **Statistical analysis.** We used Graphpad Prism 5.0 for statistical analyses and to generate  
215 figures. We compared data using paired t-tests; the Wilcoxon signed-rank test was used to  
216 measure the responses of each patient on different days. We used Pearson's correlation to assess  
217 the relationship between T and B cell responses. All reported *P* values are two tailed with 95%  
218 confidence intervals.  $P \leq 0.05$  is considered as statistically significant.

## 219 **RESULTS**

220 **Study population.** A total of 34 adult patients were recruited in this study. Demographic  
221 and clinical features of these study patients by age, sex, blood group and duration of diarrhea at  
222 presentation are shown in Table 1. Sample size in each experiment varied and was restricted by  
223 the allowed small volume of blood obtained from each participant. The enrollment of cholera  
224 patients in each group followed the progression of the experiments and generation of data, which  
225 then determined the investigators decision for the next experimental step. Twenty samples were  
226 analyzed for the determination of frequency of circulating Tfh cells and CD40L expressing Tfh  
227 cells after infection (Fig. 1), 18 were analyzed for evaluation of antigen-specific memory T cell  
228 responses (Fig. 2), 10 were used for the correlation analysis (Fig. 3) and 11 for the depletion and  
229 co-culture experiments (Fig. 4).

230

231 **Frequency of Tfh cells and CD40L expressing Tfh cells after onset of cholera.** Whole  
232 blood was diluted and stained with anti-CD3, -CD4, -CXCR5 and -CD40L antibodies, and the  
233 resulting populations were counted by flow cytometry. The percentage of Tfh cells in peripheral  
234 blood was significantly increased at day 7 ( $15.3\pm 1.1$ ) following *V. cholerae* infection compared  
235 to day 2 ( $11.5\pm 0.8$ ) ( $P < 0.0001$ ) and waning by day 30 ( $13.8\pm 0.9$ ); however, the level remained  
236 elevated above baseline (Fig. 1A). CD40L-expressing Tfh cells were also significantly elevated  
237 at day 7 ( $P = 0.01$ ) and day 30 ( $P = 0.05$ ) following infection compared to day 2 (Fig. 1B). The  
238 expression of CD40L- expressing Tfh at day 30 did not decrease compared to day 7.

239

240 **Antigen-specific Tfh cell proliferation and B cell maturity associated protein CD40L**  
241 **expression.** Whole blood was obtained on day 2, day 7 and day 30 after infection, and diluted

242 and stimulated with *V. cholerae* antigens: mCT, MP, VCC, or unstimulated for 6 hours. The  
243 Stimulation Index (SI) (the ratio of cell number after stimulation with an antigen to cell number  
244 without stimulation) was calculated for each antigen. mCT-specific Tfh cells were significantly  
245 increased at day 7 after infection compared to day 2 ( $P=0.04$ , Fig. 2). mCT-specific Tfh cells that  
246 express CD40L were also significantly elevated following infection ( $P=0.02$ ). The SI for MP and  
247 VCC antigen showed similar trends but did not reach statistical significance.

248

249 **Antigen-specific Tfh cells and CD40L-expressing Tfh cells in the circulation on day**  
250 **7 are correlated with subsequent antigen-specific IgA and IgG producing memory B cells**  
251 **on day 30 following cholera.** mCT-specific Tfh and CD40L expressing Tfh cells were  
252 determined by FASCIA on day 7 of infection as above, and rCTB-specific IgA and IgG-  
253 secreting memory B cells were evaluated by ELISPOT on day 30 following infection in the same  
254 patients, and the results examined for correlation. Tfh cells specific for mCT on day 7 following  
255 infection correlated with IgG secreting memory B cells specific for rCTB on day 30 (Pearson  $r=$   
256  $0.6$ ,  $P=0.04$ , Fig. 3); a similar trend that did not reach statistical significance was seen for IgA  
257 secreting memory B cells on day 30. mCT-specific CD40L expressing Tfh cells on day 7 also  
258 correlated with IgA (Pearson  $r= 0.7$ ,  $P=0.02$ ) and IgG (Pearson  $r= 0.7$ ,  $P=0.01$ ) secreting rCTB-  
259 specific memory B cells on day 30 following infection.

260

261 **Depletion of memory Tfh cells reduces the amount of IgG secretion by autologous B**  
262 **cells into culture supernatant following an *in vitro* co-culture of cells recovered from**  
263 **peripheral blood of cholera patients.** B cells and Tfh cells were sorted from the peripheral  
264 blood of cholera patients ( $n=11$ ) by flow cytometry. Sorted B cells (CD19+ cells) were co-

265 cultured with sorted memory Tfh cells (CD3+CD4+CD45R0+CXCR5+ cells) with antigenic  
266 stimulation; these cells secreted a significant amount of IgG in the presence of two *V. cholerae*  
267 antigens, MP or mCT, compared to B cells co-cultured with a fraction depleted in Tfh cells  
268 (CD3+CD4+CD45R0+CXCR5- cells) (Fig. 4). In comparison, without antigenic stimulation, B  
269 cells did not produce a significant amount of IgG in the presence of Tfh cells compared to  
270 depleted Tfh cells.

271 **DISCUSSION**

272 Infection with *V. cholerae* produces protective immunity and induces antigen specific  
273 IgG antibodies and IgG memory B cells to protein antigens such as CT that persist at least one  
274 year after *V. cholerae* infection (4, 25). In addition, an oral cholera vaccine containing added  
275 rCTB has been shown to elicit an antigen-specific IgG-immune response to CTB comparable to  
276 natural infection (23). Both natural infection and existing vaccines with protein components  
277 induce B cells to produce and secrete durable, class-switched IgG antigen-specific antibody.  
278 However, these durable and avid class-switched antibodies are only seen in response to protein  
279 antigens and not observed for a non-protein antigen such as lipopolysaccharide (15). This  
280 suggests that following *V. cholerae* infection, maturation of a repertoire of B cells specific for T  
281 cell dependent antigens relies on interaction with a certain population of helper T cells (26).  
282 However, the mechanism of this T cell dependent B cell maturation in a mucosal infection such  
283 as cholera is not fully defined. Here, we have shown that natural infection with *V. cholerae*  
284 induces antigen-specific Tfh cell proliferation and expression of CD40L, and that these Tfh cells  
285 then provide antigen-specific help for B cell maturation, class switched antibody secretion and  
286 subsequent development of antigen-specific memory B cell responses to the same antigens in  
287 peripheral blood. Lastly, in an *in vitro* system, B cells co-cultured with Tfh cells recovered from  
288 cholera patients resulted in increased production of class switched IgG antibodies by the B cells  
289 in culture. This suggests that Tfh cells are important in regulating B cell proliferation and  
290 maturation in this mucosal infection, leading to class switching and likely somatic  
291 hypermutation, as seen in other infections (24, 27-30).

292

293 In normal physiologic conditions, naïve T cells migrate from the thymus to the CCL19-  
294 and CCL21- rich region of a secondary lymphoid organ utilizing chemokine receptor CCR7,  
295 where they surveil for foreign antigens (31). After interacting with antigen presenting cells, these  
296 naïve T cells become a heterogeneous population of antigen primed T cells that includes  
297 CXCR5- expressing follicular helper T cells (Tfh), which migrate to the B cell zone of the  
298 lymphoid tissue utilizing interaction with CXCL13 (32, 33). The proper spatial and temporal  
299 contact-dependent interaction between an antigen-primed Tfh cell expressing CD40L and CD40  
300 expressing B cells in the T cell-B cell border of a secondary lymphoid organ is necessary for  
301 maturation of those B cells, including class switching of antibody production (10, 32, 34, 35).  
302 Without proper help either by direct contact and/or cytokine production from Tfh cells, B cells  
303 do not undergo either class switching or somatic hypermutation to produce higher avidity IgA  
304 and IgG isotype antibodies (36, 37).

305  
306 Whether similar events occur in lymphoid tissues of gastrointestinal mucosa or the  
307 draining lymph nodes following mucosal infection is not well defined. Here, we assayed  
308 peripheral blood of cholera patients in Bangladesh for circulating Tfh cells and their subsequent  
309 effect on antigen-specific B cell events following a mucosal infection caused by *V. cholerae*.  
310 Measuring these events in the circulation assumes that a small portion of the antigen-specific Tfh  
311 cells stimulated and active in germinal center follicles in lymphoid tissues migrate into, and can  
312 be assayed in peripheral blood, as shown by others (5, 19, 38). We found that Tfh cells are  
313 upregulated in the circulation on day 7 after *V. cholerae* infection, and express higher amounts of  
314 the surface B cell maturation associated marker CD40L. This suggests that similar events are  
315 taking place in the germinal centers (GC) of secondary lymphoid tissues after cholera. Previous



316 groups have shown that CD40L is critical for GC development and maintenance (39),  
317 proliferation and maintenance of highly proapoptotic B cells within GC (9), and for plasma cell  
318 formation (40). We have previously shown that CT-specific plasmablasts also peak in the  
319 circulation at day 7 after infection, at the same time as the circulating (and presumably lymphoid  
320 tissue-associated) Tfh cells expressing CD40L peak (41). The fraction of CD40L expressing Tfh  
321 cells in the circulation may underestimate the fraction of these cells in GC of secondary  
322 lymphoid tissues. However, obtaining direct samples of secondary lymphoid tissues from  
323 cholera-infected patients *in vivo* to examine this correlation is challenging from a human study  
324 standpoint.

325

326 We demonstrated that the expanded, circulating Tfh cells at day 7 after infection with  
327 increased expression of CD40L are *V. cholerae* antigen-specific, particularly to the highly  
328 immunogenic G33D mutant of cholera toxin. We have previously shown a more durable memory  
329 B cell response to CT than to the T cell independent antigen LPS, suggesting that the interaction  
330 of Tfh cells expressing CD40L with cognate B cells orchestrates this more durable memory B  
331 response to CT in cholera patients (4). A membrane preparation (MP) of *V. cholerae* was less  
332 effective in inducing Tfh cell proliferation and CD40L expression compared to mCT, which is  
333 consistent with our previous findings (22). One possible explanation for this might be the  
334 heterogeneous mixture of proteins in MP, such that the quantity of each individual protein might  
335 not overcome a threshold level of T cell interaction with cognate B cells. This might be  
336 addressed by purifying and testing the more abundant proteins from MP, such as outer  
337 membrane protein U (OmpU). Although VCC has been previously shown to be immunogenic  
338 following cholera (3), we found here that VCC was less effective at stimulating Tfh cell

339 proliferation and CD40L expression. A mutant form of VCC with lessened cytotoxicity may  
340 better assess the immunogenicity of VCC in this cellular proliferation assay.

341

342 A previous study showed that naïve T cells take approximately 3 to 4 days to enter the B  
343 cell zone of lymphoid tissues following expression of CXCR5 on their surface starting at 36  
344 hours (42); naïve T cells need to accumulate sufficient CXCR5 to overcome signals from CCR7  
345 that retain these cells in the T cell zone (32). Therefore, most antigen-activated Tfh cells are in  
346 proximity to cognate B cells in the B cell region of GC around day 7 following infection. This  
347 timing is consistent with our previous findings that the T cell response on day 7 after cholera  
348 vaccination correlates with later B cell events in vaccine recipients (22).

349

350 A recent elegant study by Cardeno *et al.*, published while this manuscript was being  
351 finalized, examined circulating Tfh cells in adults following oral vaccination with an inactivated  
352 ETEC vaccine (19), and the relationship of these circulating Tfh cells and B cell events.  
353 Although they found a small increase in overall CXCR5-expressing Tfh cells in the circulation 7  
354 days after vaccination, they found a larger increase in the fraction of these Tfh cells expressing  
355 the activation marker ICOS; this is similar to our results with CD40L expression on circulating  
356 Tfh cells after cholera. Cardeno *et al.* (19) showed that circulating Tfh cells after ETEC  
357 vaccination express increased amounts of PD1 and  $\beta 7$ , and produce increased IL-21 after  
358 stimulation. ETEC vaccination also led to an increased number of plasmablasts in the circulation  
359 on day 7 after vaccination, and the majority of these expressed IgA and  $\beta 7$ , consistent with  
360 mucosal homing. In this study (19), there was a correlation of the fold rise of circulating

361 activated Tfh cells in the circulation on day 7 and the fold rise in circulating IgA plasmablasts on  
362 day 7.

363

364 To directly model the effect of the circulating, antigen-specific Tfh cells on B cell  
365 maturation in our study, we utilized short term *in vitro* co-culture of Tfh cells and isolated B cells  
366 from cholera patients 7 days following infection. We showed that co-culture of CXCR5+,  
367 CD40L expressing Tfh cells with autologous B cells in the presence of *V. cholerae* antigens  
368 stimulated production of IgG antibody in culture supernatants, while depletion of the Tfh cells  
369 from the pool of circulating T cells resulted in a significantly lower amount of IgG antibody  
370 production. A previous study by another group utilized co-culture of circulating B cells with  
371 CXCR5+ T cells from patients with the autoimmune disease juvenile dermatomyositis (5) and  
372 showed increased production of IgG and IgA antibodies in culture supernatants compared to co-  
373 culture of B cells with CXCR5-depleted T cells. Cardeno *et al.* (19) similarly isolated circulating  
374 Tfh cells and B cells following ETEC vaccination and showed that *in vitro* co-culture produced  
375 an increased frequency of IgA secreting plasmablasts differentiated from the B cells in the  
376 culture, increased amounts of total IgA and IgG secreted into culture supernatants, and increased  
377 IgA in culture supernatant specific for the B subunit of ETEC heat-labile enterotoxin from the  
378 vaccine. Of note, the two previous studies (5, 19) utilized the superantigen SEB in the co-culture  
379 experiments to stimulate the Tfh cells *in vitro*. We also used SEB as a positive control, but also  
380 showed that cholera-specific antigens could be utilized for antigenic stimulation as well, as  
381 opposed to a superantigen.

382

383           Cardeno *et al.* (19) also examined patients undergoing ETEC revaccination 1-2 years  
384 later to show a correlation between the fold rise of ICOS+, circulating Tfh cells on day 7 post  
385 primary vaccination, and the fold rise of IgA responses in circulating, mucosal antibody-  
386 secreting cells to ETEC antigens following revaccination 1-2 years later. We similarly found a  
387 correlation between CD40L expressing Tfh cells circulating on day 7 following cholera, and IgA  
388 and IgG memory B cell responses to rCTB on day 30 following infection. Both these  
389 observations are consistent with a model whereby Tfh cells in gut-associated lymphoid tissues  
390 induce B cells to mature to class switched IgA and IgG antibody producing plasma cells, as well  
391 as IgA and IgG memory B cells that are then found in the circulation following cholera (23).

392  
393           Recently, Holmgren *et al.* summarized some novel approaches to correlate early human  
394 mucosal immune responses with subsequent protection following mucosal vaccination, which  
395 include the investigation of gut-originating antibody-secreting cells (ASCs), memory B cells and  
396 Tfh cells from samples of peripheral blood during their recirculation from lymphoid tissues (43).  
397 A previous report, however, suggests that in the absence of cognate interactions, the function of  
398 CD4 Tfh cells in germinal centers of Peyer patches, as opposed to other lymphoid tissues, is not  
399 clear (44). To better understand the role of Tfh cells in immune responses in cholera patients,  
400 further investigation including single cell studies from gut biopsies at the site of *V. cholerae*  
401 replication may be needed.

402  
403           Our study and the previous work of others (5, 19) are consistent with a model in which  
404 activated Tfh cells in lymphoid tissues interact with B cells following mucosal infection or  
405 vaccination to stimulate affinity maturation and differentiation of antigen-specific plasmablasts  
406 and memory B cells, and that these events are important in development of mucosal memory to

407 T cell dependent antigens. However, the protective immune response following cholera appears  
408 to be against the the O-specific polysaccharide component of LPS which is the immunogenic  
409 part (45); how mucosal memory develops to this T cell independent antigen is not yet clear, and  
410 also requires further study.

411 **ACKNOWLEDGEMENT**

412 This work was supported by the International Centre for Diarrhoeal Disease Research,  
413 Bangladesh (icddr,b). This study was also supported by grants from the National Institutes of  
414 Health, including grants from the National Institute of Allergy and Infectious Diseases  
415 (AI106878 [E.T.R. and F.Q.] and AI058935 [S.B.C., E.T.R., and F.Q.], AI103055 [J.B.H. and  
416 F.Q] and K08 AI123494 [A.A.W.], as well as the Fogarty International Center (Training Grant in  
417 Vaccine Development and Public Health; TW005572 [T.R.B., and R.R.]) and Emerging Global  
418 Leader Award; K43 TW010362 [T.R.B.]). The funders had no role in study design, data  
419 collection and analysis, decision to publish, or preparation of the manuscript. We are also  
420 grateful to the Governments of Bangladesh, Canada, Sweden and the UK for providing  
421 core/unrestricted support.

422

423 **Author contribution statements:**

424 Conceived and designed the experiments: TRB, AW, RR, FQ; Performed the  
425 experiments: RR, AW, TRB, RH, LH, AP; Analyzed the data: RR, TRB; Contributed  
426 reagents/materials/analysis tools: FQ SBC, ETR, JBH; Wrote the paper: RR, TRB, FQ, SBC,  
427 ETR, AW, JBH; Enrollment of volunteers and clinical evaluation: AIK, FC.

428

429 **Conflict of interest statement:** None of the authors report any conflict of interest for the work

430 reported here.

431 **Table 1.** Demographic and clinical features of patients participating in this study.  
432

| <b>Characteristics</b>                                               | <b>Patients</b> |
|----------------------------------------------------------------------|-----------------|
| Number of study participants                                         | 34              |
| Median age in years (25 <sup>th</sup> , 75 <sup>th</sup> percentile) | 35 (29.8, 40.3) |
| Gender, female (%)                                                   | 12 (35.3)       |
| Mean (SD) duration of diarrhea, hours                                | 30.7 (56.1)     |
| Blood group (%)                                                      |                 |
| A                                                                    | 25.8            |
| B                                                                    | 45.2            |
| O                                                                    | 25.8            |
| AB                                                                   | 3.2             |

433

434 **Figure legends:**

435 **Fig 1** (A) Frequency of Tfh cells (CD3+CD4+CXCR5+) and (B) frequency of CD40L-  
436 expressing Tfh cells (CD3+CD4+CXCR5+CD40L+) plotted as a percentage of total CD4+ cells  
437 in peripheral blood at day 2 (D2), day 7 (D7) and day 30 (D30) following onset of cholera  
438 (n=20). Data are presented as the mean percentage of Tfh cells and the CD40L+ Tfh cells, with  
439 error bars representing standard error of the mean. An asterisk represents a significant increase  
440 from day 2 or decrease from day 7 (\* <0.05, \*\*<0.01, \*\*\*<0.001) using a paired t-test.

441  
442 **Fig 2** Evaluation of antigen-specific proliferation (n=18) of Tfh cells (A) and CD40L-expressing  
443 Tfh cells (B) after cholera; cells were stimulated with G33D mutant cholera toxin (mCT), *V.*  
444 *cholerae* membrane preparation (MP), and *V. cholerae* cytolysin (VCC). Data are presented as  
445 mean stimulation indices (SI) of Tfh cells and CD40L expressing Tfh cells, with error bars  
446 representing standard errors of the mean. Asterisks represent a P-value less than or equal to 0.05  
447 and represent a significant increase from day 2.

448  
449 **Fig 3** Correlation of day 7 circulating antigen-specific Tfh and CD40L-expressing Tfh cells with  
450 subsequent antigen-specific memory B cells at day 30 in the same patients (n=10). The  
451 stimulation index (SI) of Tfh cells (CXCR5+) or CD40L-expressing Tfh cells were analyzed for  
452 correlation with rCTB-specific IgG memory B cells (A, B), and with rCTB-specific IgA memory  
453 B cells (C, D). Correlation was determined by the Pearson correlation coefficient.

454  
455 **Fig 4** *In vitro* co-culture of Tfh cells or Tfh depleted T helper cells with B cells after 7 days, with  
456 antigenic stimulation (MP, mCT, or SEB) and a media only control (n=11). Data are presented as



457 the mean concentration of IgG in ng/ml of culture supernatant, with error bars representing the  
458 standard errors of the mean. B, Tfh<sup>+</sup> and Tfh<sup>-</sup> cells are defined as CD19<sup>+</sup> cells,  
459 CD3<sup>+</sup>CD4<sup>+</sup>CD45R0<sup>+</sup>CXCR5<sup>+</sup> cells and CD3<sup>+</sup>CD4<sup>+</sup>CD45R0<sup>+</sup>CXCR5<sup>-</sup> cells, respectively. An  
460 asterisk represents a significant decrease of IgG after depletion of Tfh compared to nondepleted  
461 Tfh cells (\* <0.05, \*\*<0.01).

462 **Reference:**

- 463 1. WHO. 2012. Cholera. *Weekly epidemiological record* 87:289-304.
- 464 2. Herrington DA, Hall RH, Losonsky G, Mekalanos JJ, Taylor RK, Levine MM. 1988.  
465 Toxin, toxin-coregulated pili, and the *toxR* regulon are essential for *Vibrio cholerae*  
466 pathogenesis in humans. *J Exp Med* 168:1487-92.
- 467 3. Weil AA, Arifuzzaman M, Bhuiyan TR, LaRocque RC, Harris AM, Kendall EA, Hossain  
468 A, Tarique AA, Sheikh A, Chowdhury F, Khan AI, Murshed F, Parker KC, Banerjee KK,  
469 Ryan ET, Harris JB, Qadri F, Calderwood SB. 2009. Memory T-cell responses to *Vibrio*  
470 *cholerae* O1 infection. *Infect Immun* 77:5090-6.
- 471 4. Harris AM, Bhuiyan MS, Chowdhury F, Khan AI, Hossain A, Kendall EA, Rahman A,  
472 LaRocque RC, Wrammert J, Ryan ET, Qadri F, Calderwood SB, Harris JB. 2009.  
473 Antigen-specific memory B-cell responses to *Vibrio cholerae* O1 infection in  
474 Bangladesh. *Infect Immun* 77:3850-6.
- 475 5. Morita R, Schmitt N, Bentebibel SE, Ranganathan R, Bourdery L, Zurawski G, Foucat E,  
476 Dullaers M, Oh S, Sabzghabaei N, Lavecchio EM, Punaro M, Pascual V, Banchereau J,  
477 Ueno H. 2011. Human blood CXCR5(+)CD4(+) T cells are counterparts of T follicular  
478 cells and contain specific subsets that differentially support antibody secretion. *Immunity*  
479 34:108-21.
- 480 6. Haynes NM, Allen CD, Lesley R, Ansel KM, Killeen N, Cyster JG. 2007. Role of  
481 CXCR5 and CCR7 in follicular Th cell positioning and appearance of a programmed cell  
482 death gene-1high germinal center-associated subpopulation. *J Immunol* 179:5099-108.

- 483 7. Johnston RJ, Poholek AC, DiToro D, Yusuf I, Eto D, Barnett B, Dent AL, Craft J, Crotty  
484 S. 2009. Bcl6 and Blimp-1 are reciprocal and antagonistic regulators of T follicular  
485 helper cell differentiation. *Science* 325:1006-10.
- 486 8. McHeyzer-Williams LJ, Pelletier N, Mark L, Fazilleau N, McHeyzer-Williams MG.  
487 2009. Follicular helper T cells as cognate regulators of B cell immunity. *Curr Opin*  
488 *Immunol* 21:266-73.
- 489 9. Takahashi Y, Dutta PR, Cerasoli DM, Kelsoe G. 1998. In situ studies of the primary  
490 immune response to (4-hydroxy-3-nitrophenyl)acetyl. V. Affinity maturation develops in  
491 two stages of clonal selection. *J Exp Med* 187:885-95.
- 492 10. Crotty S. 2011. Follicular helper CD4 T cells (TFH). *Annu Rev Immunol* 29:621-63.
- 493 11. Good-Jacobson KL, Shlomchik MJ. 2010. Plasticity and heterogeneity in the generation  
494 of memory B cells and long-lived plasma cells: the influence of germinal center  
495 interactions and dynamics. *J Immunol* 185:3117-25.
- 496 12. Monsur KA. 1961. A highly selective gelatin-taurocholate-tellurite medium for the  
497 isolation of *Vibrio cholerae*. *Trans R Soc Trop Med Hyg* 55:440-2.
- 498 13. Qadri F, Azim T, Chowdhury A, Hossain J, Sack RB, Albert MJ. 1994. Production,  
499 characterization, and application of monoclonal antibodies to *Vibrio cholerae* O139  
500 synonym Bengal. *Clin Diagn Lab Immunol* 1:51-4.
- 501 14. Rahman M, Sack DA, Mahmood S, Hossain A. 1987. Rapid diagnosis of cholera by  
502 coagglutination test using 4-h fecal enrichment cultures. *J Clin Microbiol* 25:2204-6.
- 503 15. Alam MM, Arifuzzaman M, Ahmad SM, Hosen MI, Rahman MA, Rashu R, Sheikh A,  
504 Ryan ET, Calderwood SB, Qadri F. 2013. Study of avidity of antigen-specific antibody

- 505 as a means of understanding development of long-term immunological memory after  
506 *Vibrio cholerae* O1 infection. *Clin Vaccine Immunol* 20:17-23.
- 507 16. Yamamoto K, Ichinose Y, Nakasone N, Tanabe M, Nagahama M, Sakurai J, Iwanaga M.  
508 1986. Identity of hemolysins produced by *Vibrio cholerae* non-O1 and *V. cholerae* O1,  
509 biotype El Tor. *Infect Immun* 51:927-31.
- 510 17. Iwanaga M, Yamamoto K. 1985. New medium for the production of cholera toxin by  
511 *Vibrio cholerae* O1 biotype El Tor. *J Clin Microbiol* 22:405-8.
- 512 18. Wolf AA, Jobling MG, Saslowsky DE, Kern E, Drake KR, Kenworthy AK, Holmes RK,  
513 Lencer WI. 2008. Attenuated endocytosis and toxicity of a mutant cholera toxin with  
514 decreased ability to cluster ganglioside GM1 molecules. *Infect Immun* 76:1476-84.
- 515 19. Cardeno A, Magnusson MK, Quiding-Jarbrink M, Lundgren A. 2018. Activated T  
516 follicular helper-like cells are released into blood after oral vaccination and correlate with  
517 vaccine specific mucosal B-cell memory. *Sci Rep* 8:2729.
- 518 20. Gaines H, Andersson L, Biberfeld G. 1996. A new method for measuring  
519 lymphoproliferation at the single-cell level in whole blood cultures by flow cytometry. *J*  
520 *Immunol Methods* 195:63-72.
- 521 21. Svahn A, Linde A, Thorstensson R, Karlen K, Andersson L, Gaines H. 2003.  
522 Development and evaluation of a flow-cytometric assay of specific cell-mediated  
523 immune response in activated whole blood for the detection of cell-mediated immunity  
524 against varicella-zoster virus. *J Immunol Methods* 277:17-25.
- 525 22. Arifuzzaman M, Rashu R, Leung DT, Hosen MI, Bhuiyan TR, Bhuiyan MS, Rahman  
526 MA, Khanam F, Saha A, Charles RC, LaRocque RC, Weil AA, Clements JD, Holmes  
527 RK, Calderwood SB, Harris JB, Ryan ET, Qadri F. 2012. Antigen-specific memory T

- 528 cell responses after vaccination with an oral killed cholera vaccine in Bangladeshi  
529 children and comparison to responses in patients with naturally acquired cholera. *Clin*  
530 *Vaccine Immunol* 19:1304-11.
- 531 23. Alam MM, Riyadh MA, Fatema K, Rahman MA, Akhtar N, Ahmed T, Chowdhury MI,  
532 Chowdhury F, Calderwood SB, Harris JB, Ryan ET, Qadri F. 2011. Antigen-specific  
533 memory B-cell responses in Bangladeshi adults after one- or two-dose oral killed cholera  
534 vaccination and comparison with responses in patients with naturally acquired cholera.  
535 *Clin Vaccine Immunol* 18:844-50.
- 536 24. Crotty S, Aubert RD, Glidewell J, Ahmed R. 2004. Tracking human antigen-specific  
537 memory B cells: a sensitive and generalized ELISPOT system. *J Immunol Methods*  
538 286:111-22.
- 539 25. Levine MM, Black RE, Clements ML, Cisneros L, Nalin DR, Young CR. 1981. Duration  
540 of infection-derived immunity to cholera. *J Infect Dis* 143:818-20.
- 541 26. Allen CD, Okada T, Cyster JG. 2007. Germinal-center organization and cellular  
542 dynamics. *Immunity* 27:190-202.
- 543 27. Breitfeld D, Ohl L, Kremmer E, Ellwart J, Sallusto F, Lipp M, Forster R. 2000. Follicular  
544 B helper T cells express CXC chemokine receptor 5, localize to B cell follicles, and  
545 support immunoglobulin production. *J Exp Med* 192:1545-52.
- 546 28. Campbell DJ, Kim CH, Butcher EC. 2001. Separable effector T cell populations  
547 specialized for B cell help or tissue inflammation. *Nat Immunol* 2:876-81.
- 548 29. Fazilleau N, McHeyzer-Williams LJ, Rosen H, McHeyzer-Williams MG. 2009. The  
549 function of follicular helper T cells is regulated by the strength of T cell antigen receptor  
550 binding. *Nat Immunol* 10:375-84.

- 551 30. Kim CH, Rott L, Kunkel EJ, Genovese MC, Andrew DP, Wu L, Butcher EC. 2001. Rules  
552 of chemokine receptor association with T cell polarization in vivo. *J Clin Invest*  
553 108:1331-9.
- 554 31. Forster R, Schubel A, Breitfeld D, Kremmer E, Renner-Muller I, Wolf E, Lipp M. 1999.  
555 CCR7 coordinates the primary immune response by establishing functional  
556 microenvironments in secondary lymphoid organs. *Cell* 99:23-33.
- 557 32. Hardtke S, Ohl L, Forster R. 2005. Balanced expression of CXCR5 and CCR7 on  
558 follicular T helper cells determines their transient positioning to lymph node follicles and  
559 is essential for efficient B-cell help. *Blood* 106:1924-31.
- 560 33. Reif K, Ekland EH, Ohl L, Nakano H, Lipp M, Forster R, Cyster JG. 2002. Balanced  
561 responsiveness to chemoattractants from adjacent zones determines B-cell position.  
562 *Nature* 416:94-9.
- 563 34. Aversa G, Punnonen J, Carballido JM, Cocks BG, de Vries JE. 1994. CD40 ligand-CD40  
564 interaction in Ig isotype switching in mature and immature human B cells. *Semin*  
565 *Immunol* 6:295-301.
- 566 35. Garside P, Ingulli E, Merica RR, Johnson JG, Noelle RJ, Jenkins MK. 1998.  
567 Visualization of specific B and T lymphocyte interactions in the lymph node. *Science*  
568 281:96-9.
- 569 36. Fuleihan R, Ramesh N, Geha RS. 1993. Role of CD40-CD40-ligand interaction in Ig-  
570 isotype switching. *Curr Opin Immunol* 5:963-7.
- 571 37. van Zelm MC, Bartol SJ, Driessen GJ, Mascart F, Reisli I, Franco JL, Wolska-Kusnierz  
572 B, Kanegane H, Boon L, van Dongen JJ, van der Burg M. 2014. Human CD19 and

- 573 CD40L deficiencies impair antibody selection and differentially affect somatic  
574 hypermutation. *J Allergy Clin Immunol* 134:135-44.
- 575 38. Forster R, Emrich T, Kremmer E, Lipp M. 1994. Expression of the G-protein--coupled  
576 receptor BLR1 defines mature, recirculating B cells and a subset of T-helper memory  
577 cells. *Blood* 84:830-40.
- 578 39. Han S, Hathcock K, Zheng B, Kepler TB, Hodes R, Kelsoe G. 1995. Cellular interaction  
579 in germinal centers. Roles of CD40 ligand and B7-2 in established germinal centers. *J*  
580 *Immunol* 155:556-67.
- 581 40. Renshaw BR, Fanslow WC, 3rd, Armitage RJ, Campbell KA, Liggitt D, Wright B,  
582 Davison BL, Maliszewski CR. 1994. Humoral immune responses in CD40 ligand-  
583 deficient mice. *J Exp Med* 180:1889-900.
- 584 41. Rahman A, Rashu R, Bhuiyan TR, Chowdhury F, Khan AI, Islam K, LaRocque RC,  
585 Ryan ET, Wrammert J, Calderwood SB, Qadri F, Harris JB. 2013. Antibody-secreting  
586 cell responses after *Vibrio cholerae* O1 infection and oral cholera vaccination in adults in  
587 Bangladesh. *Clin Vaccine Immunol* 20:1592-8.
- 588 42. Ebert LM, Schaerli P, Moser B. 2005. Chemokine-mediated control of T cell traffic in  
589 lymphoid and peripheral tissues. *Mol Immunol* 42:799-809.
- 590 43. Holmgren J, Parashar UD, Plotkin S, Louis J, Ng SP, Desauziers E, Picot V, Saadatian-  
591 Elahi M. 2017. Correlates of protection for enteric vaccines. *Vaccine* 35:3355-3363.
- 592 44. Lycke NY, Bemark M. 2012. The role of Peyer's patches in synchronizing gut IgA  
593 responses. *Front Immunol* 3:329.
- 594 45. Leung DT, Uddin T, Xu P, Aktar A, Johnson RA, Rahman MA, Alam MM, Bufano MK,  
595 Eckhoff G, Wu-Freeman Y, Yu Y, Sultana T, Khanam F, Saha A, Chowdhury F, Khan

596 AI, Charles RC, Larocque RC, Harris JB, Calderwood SB, Kovac P, Qadri F, Ryan ET.  
597 2013. Immune responses to the O-specific polysaccharide antigen in children who  
598 received a killed oral cholera vaccine compared to responses following natural cholera  
599 infection in Bangladesh. *Clin Vaccine Immunol* 20:780-8.  
600



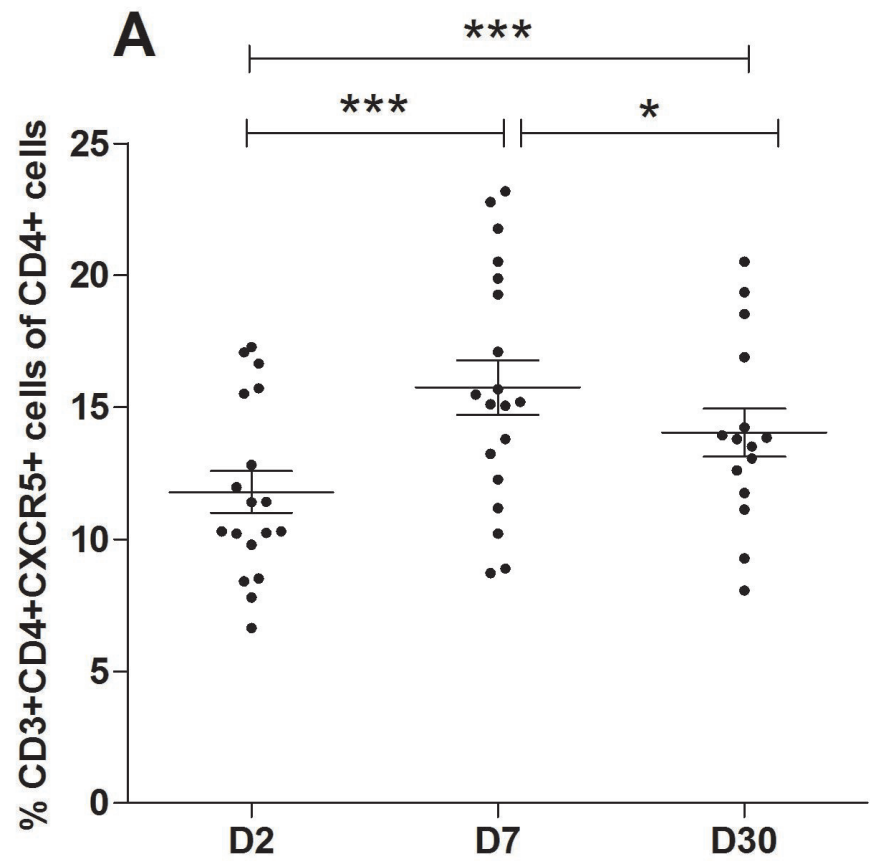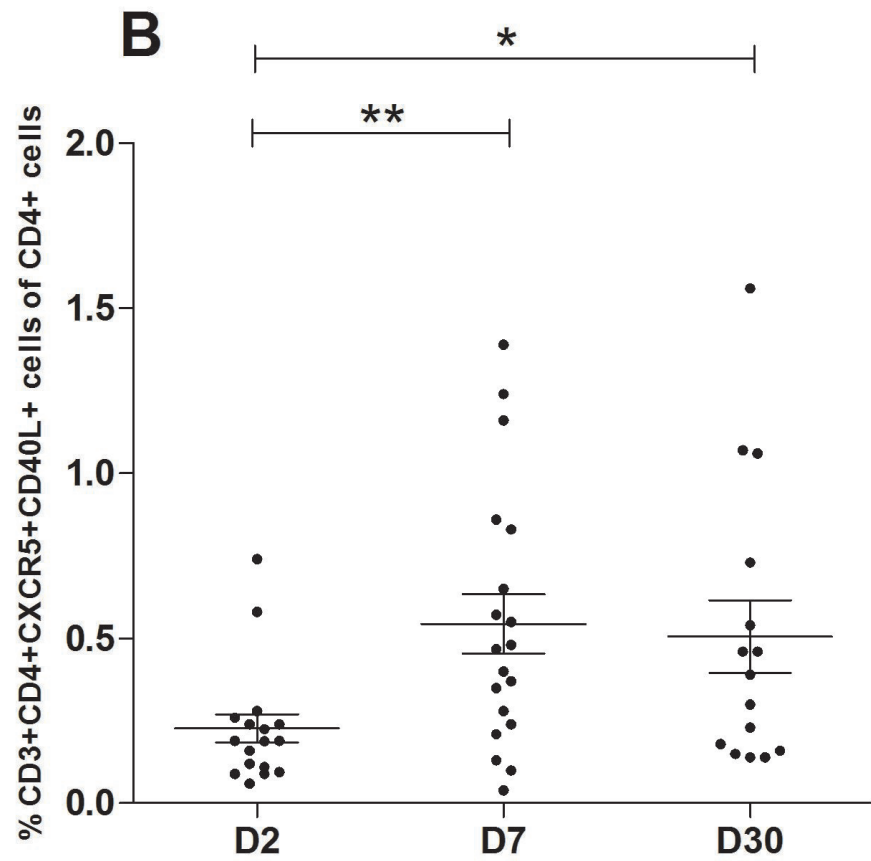

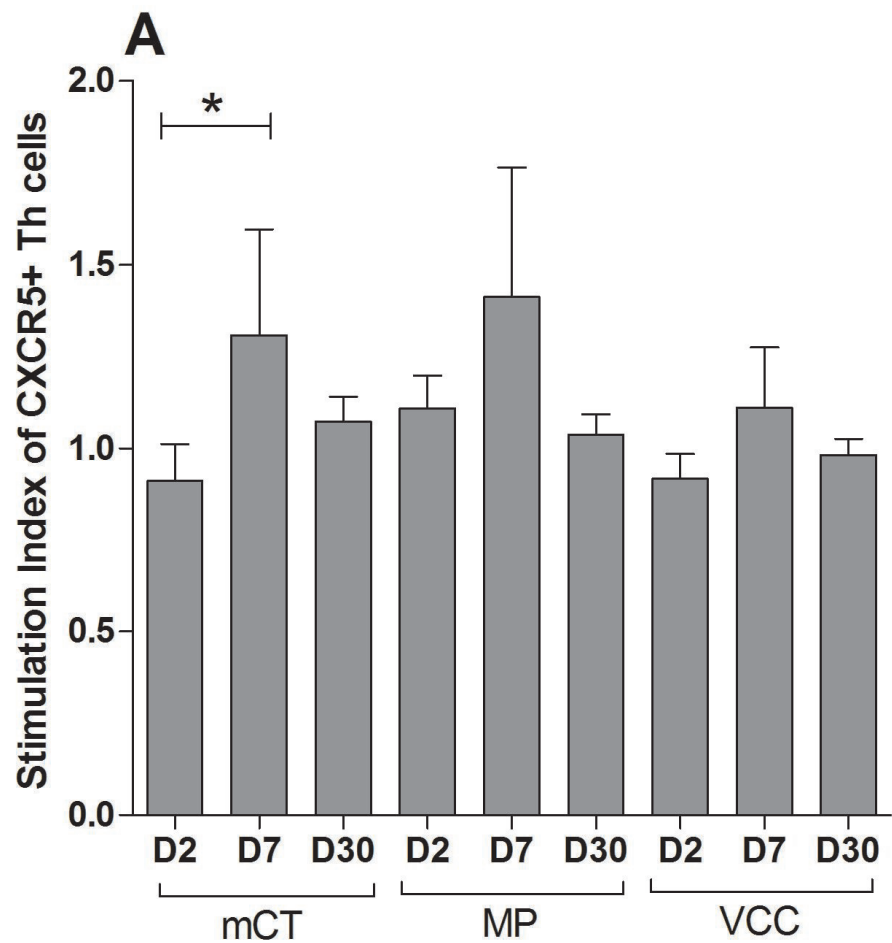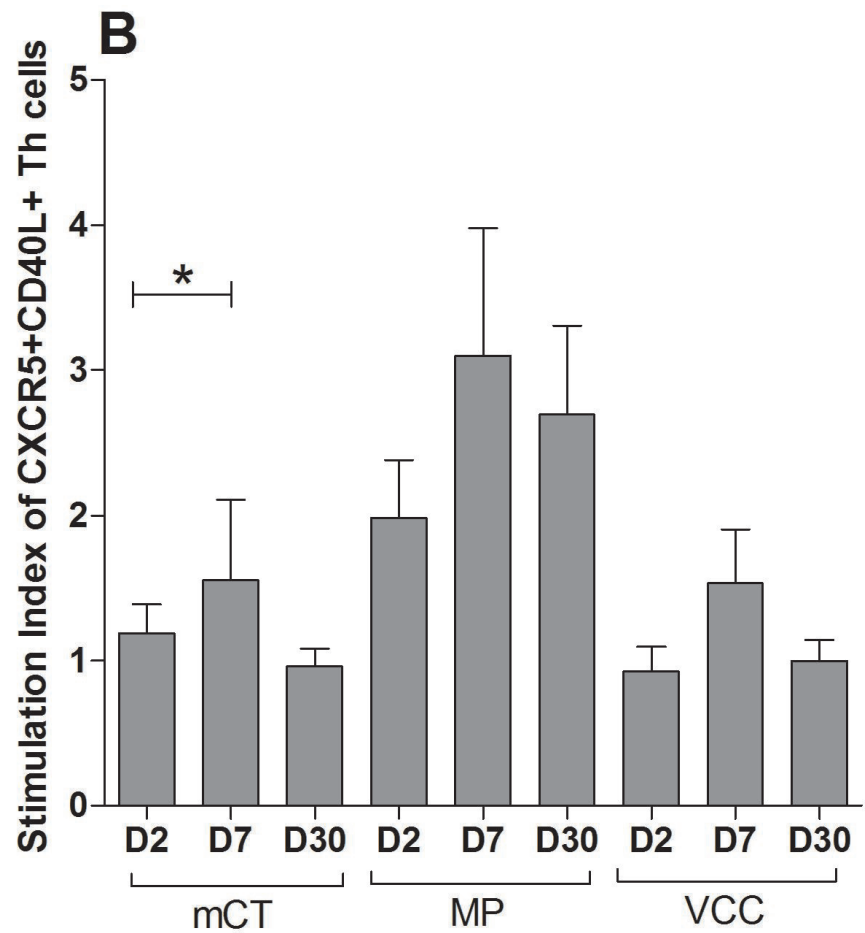

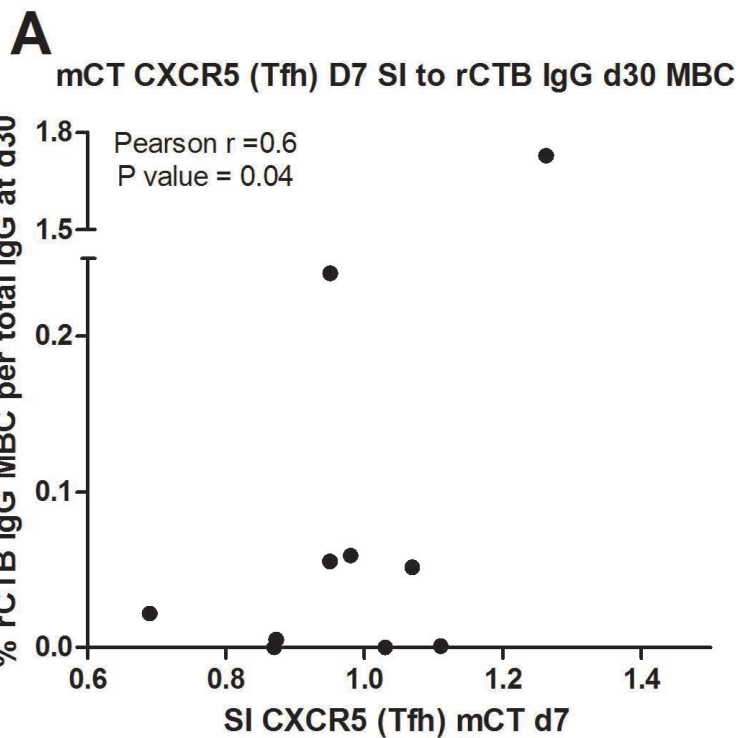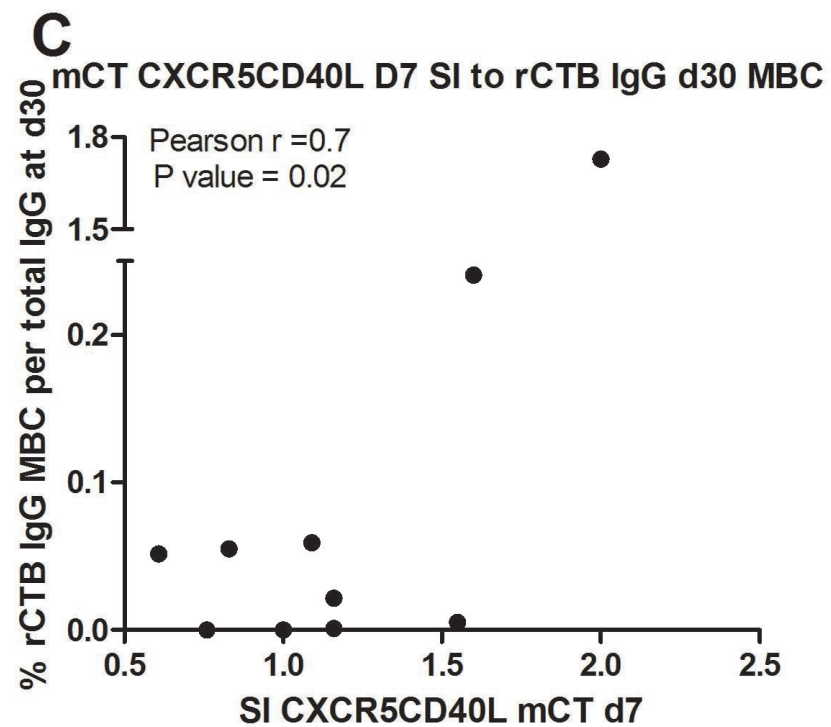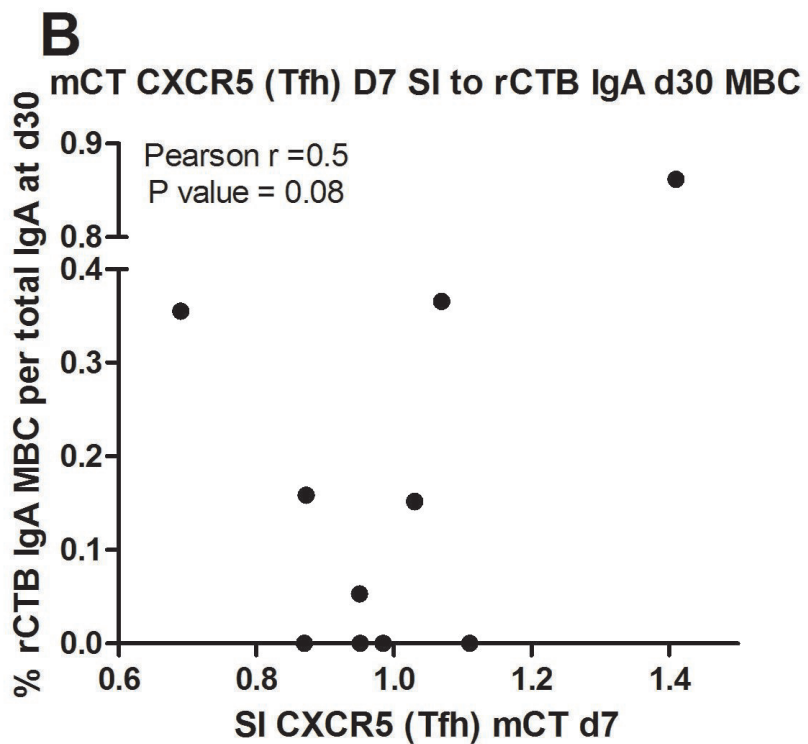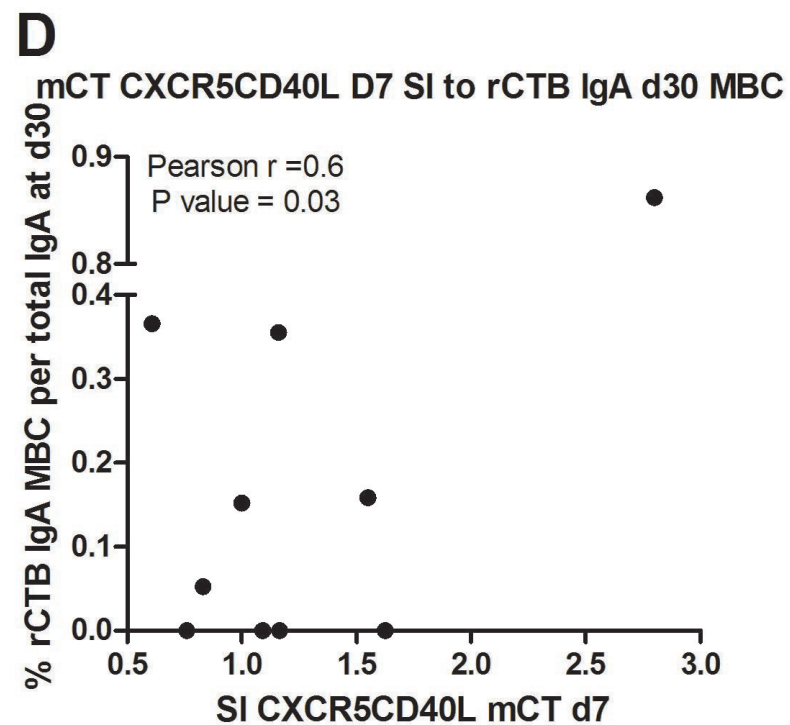

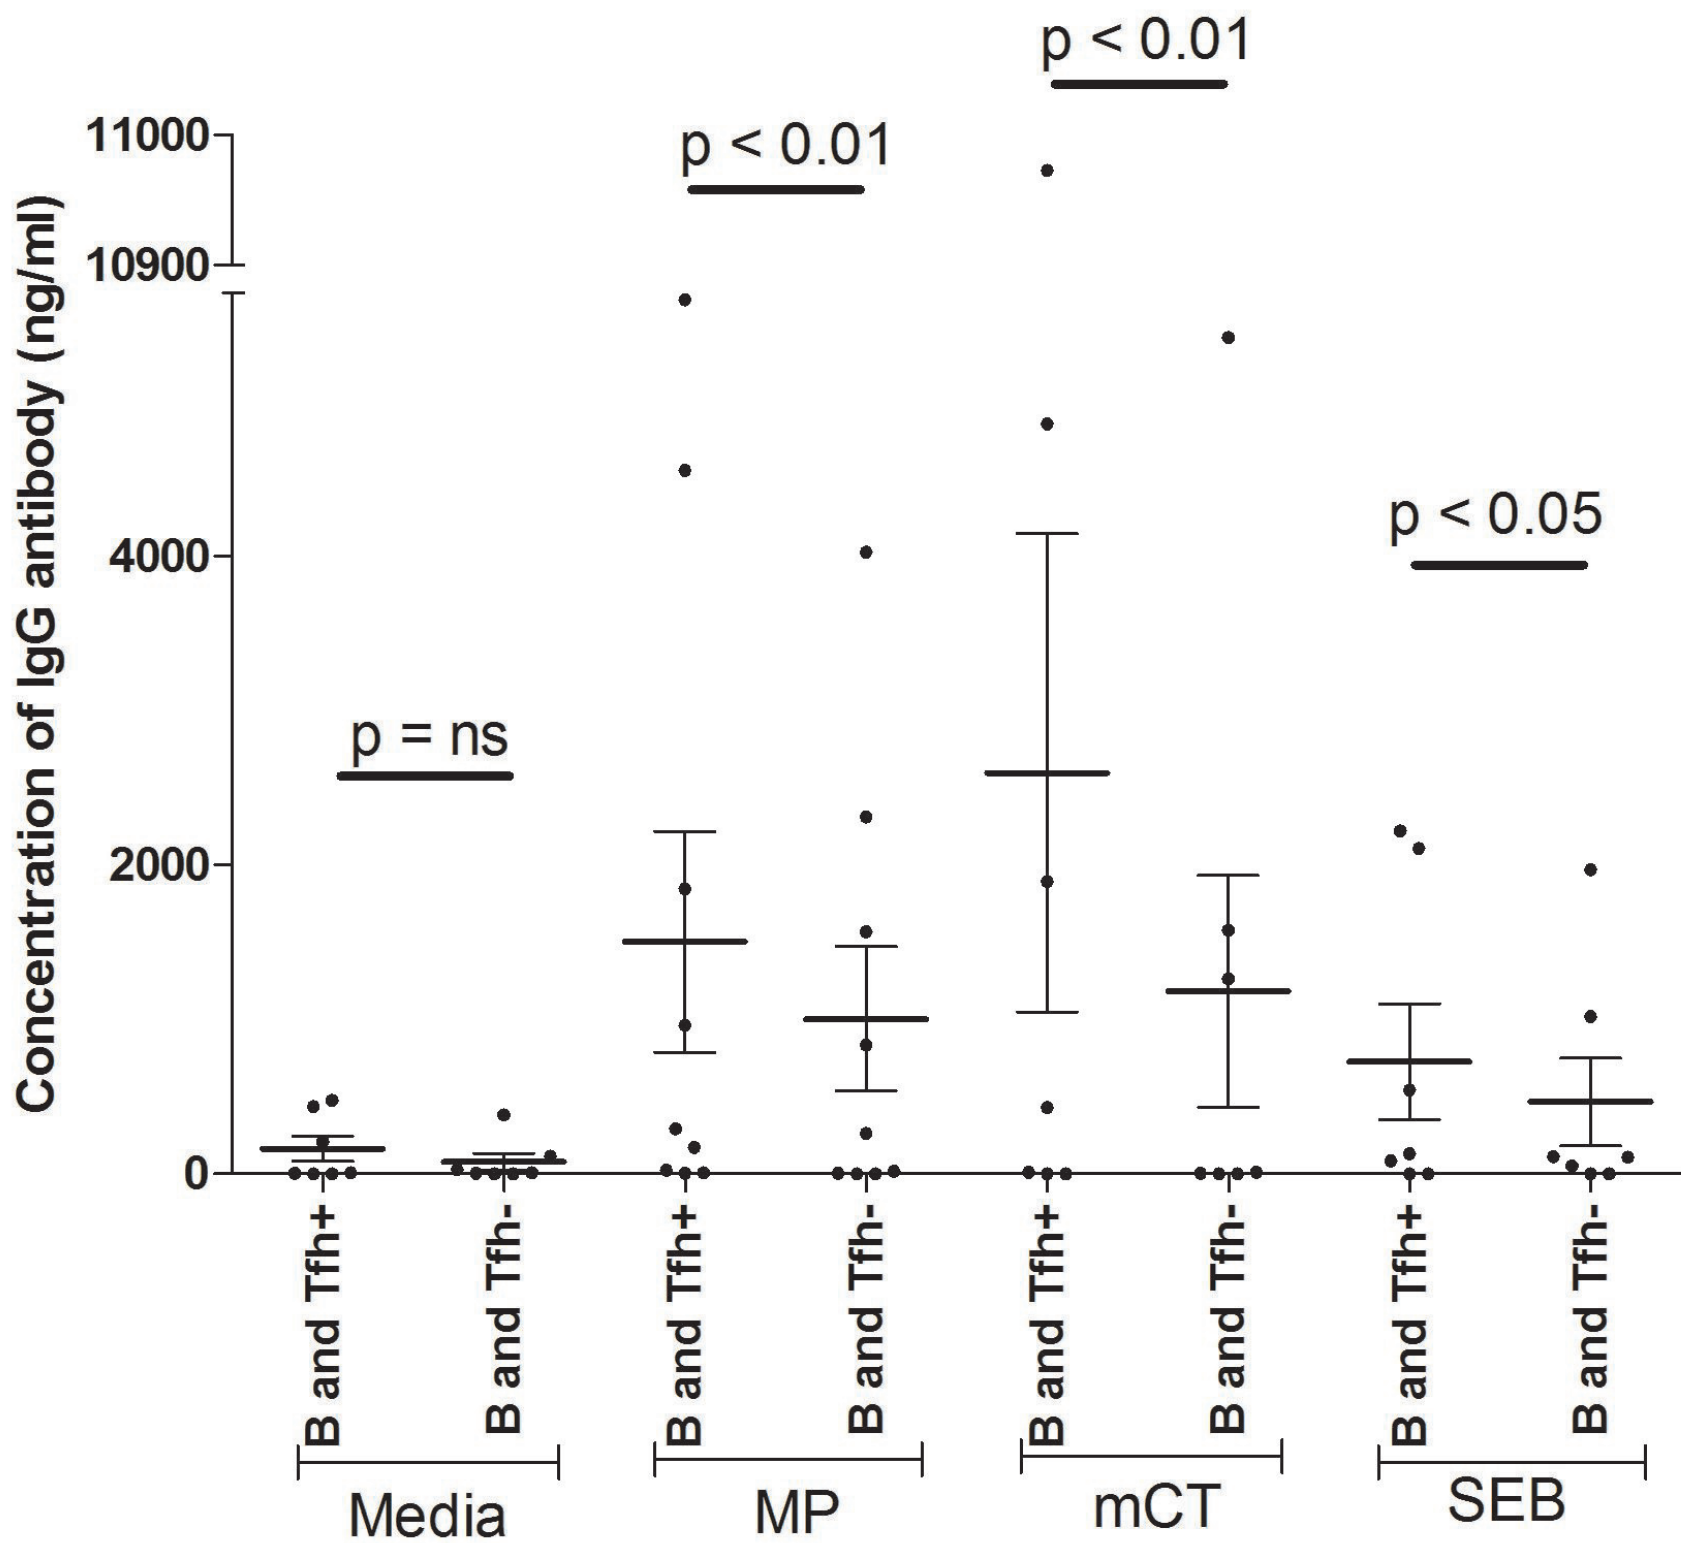

Source: http://biorxiv.org/content/10.1101/306365v1.full.pdf
